# Supplementary material for: Core/shell Ag@silicate nanoplatelets and poly(vinyl alcohol) spherical nanohybrids fabricated by coaxial electrospraying as highly sensitive SERS substrates
Source: Royal Society of Chemistry journal article supplement (doi:10.1039/c6ra06584h), 2016-01-01
Supplement: c6ra06584h1.pdf [file c6ra06584h1.pdf]

## Supporting Information

Core/shell Ag@silicate nanoplatelets and poly(vinyl alcohol)  
spherical nanohybrids fabricated by coaxial electrospraying as  
highly sensitive SERS substrates

Chih-Wei Chiu\* and Po-Hsien Lin

Department of Materials Science and Engineering, National Taiwan University of Science and  
Technology, Taipei 10607, Taiwan

\*Corresponding author:

Tel: +886-2-2737-6521; Fax: +886-2-2737-6544; E-mail: [cwchiu@mail.ntust.edu.tw](mailto:cwchiu@mail.ntust.edu.tw)

## Contents:

### SCHEME CAPTION

**Scheme S1.** Synthesis of copolymer as organic dispersant.

### FIGURE CAPTIONS

**Fig. S1** FT-IR spectra of PIB-amidoacid-POE-amidoacid-PIB intermediate and PIB-imide-POE-imide-PIB tri-block copolymer (copolymer).

**Fig. S2** UV-Vis absorption spectra of the colloidal AgNPs in AgNO<sub>3</sub>/copolymer/silicate reductions with a weight ratio of 1:1:0. Inset: 0.005 wt% yellow-gold solution confirming AgNP formation following treatment at 80 °C for 9 h.

**Fig. S3** UV-Vis absorption spectra of the colloidal AgNPs in AgNO<sub>3</sub>/copolymer/silicate reductions with a weight ratio of 1:1:1. Inset: 0.005 wt% yellow-gold solution confirming AgNP formation following treatment at 80 °C for 10 h.

**Fig. S4** UV-Vis absorption spectra of the colloidal AgNPs in AgNO<sub>3</sub>/copolymer/silicate reductions with a weight ratio of 10:10:1. Inset: 0.005 wt% yellow-gold solution confirming AgNP formation following treatment at 80 °C for 8 h.

**Fig. S5** UV-Vis absorption spectra of the colloidal AgNPs in AgNO<sub>3</sub>/copolymer/silicate reductions with a weight ratio of 20:20:1. Inset: 0.005 wt% yellow-gold solution confirming AgNP formation following treatment at 80 °C for 8 h.

### TABLE LIST

**Table S1.** Solubility of PIB-SA, POE-2000, and tri-block copolymer in water and organic solvents.

### VIDEO LIST

**Video S1.** A movie demonstrating the Taylor cone from hybrid liquid droplets in the electrospray process is provided. The liquid body of the inner needle PVA solution and the outer needle Ag@silicate

hybrids shows a conical shape, referred to as the Taylor cone, at 25 KV threshold voltage, with a half angle of  $49.8^\circ$ .

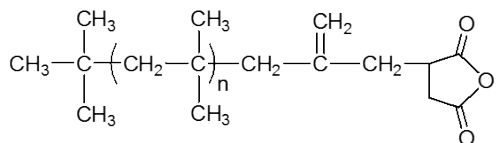

Polyisobutylene-*g*-succinic anhydride  
(PIB-SA)  $n = 25\text{--}26$ ,  $M_w = 1,335$  g/mol

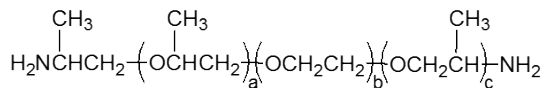

Poly(oxyethylene)-diamine  
(POE-2000)  $a+c = 6$ ,  $b = 39$ ,  $M_w = 2,000$  g/mol

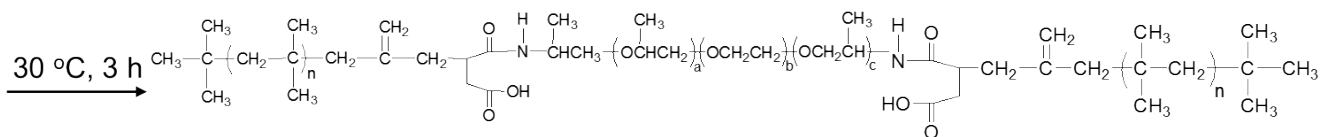

PIB-amidoacid-POE-amidoacid-PIB intermediate

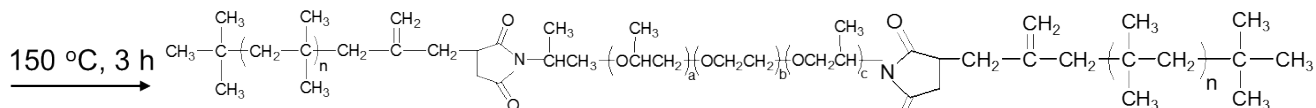

PIB-imide-POE-imide-PIB tri-block copolymer (copolymer)

**Scheme S1.** Synthesis of copolymer as organic dispersant.

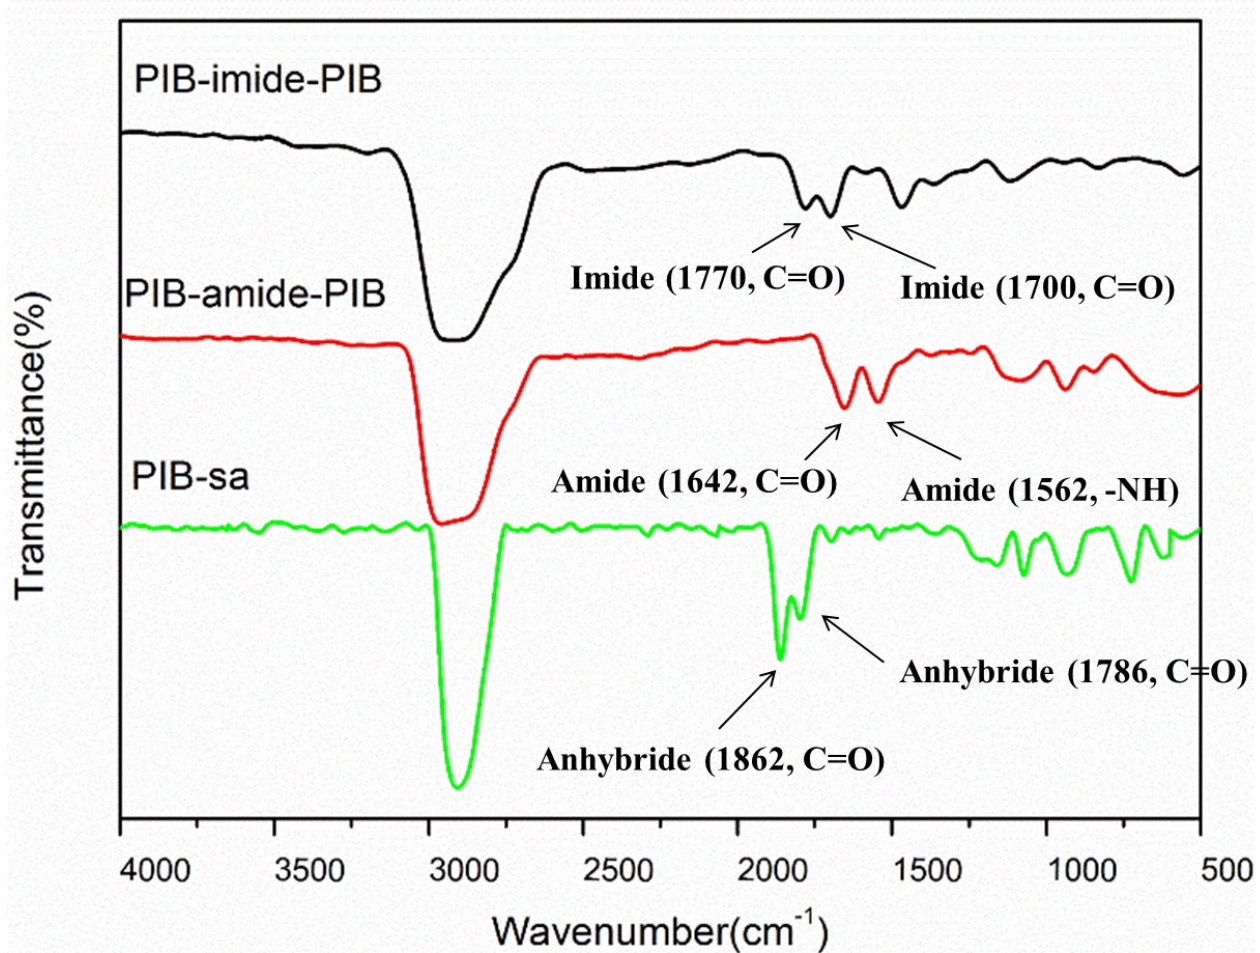

**Fig. S1** FT-IR spectra of PIB-amidoacid-POE-amidoacid-PIB intermediate and PIB-imide-POE-imide-PIB tri-block copolymer (copolymer).

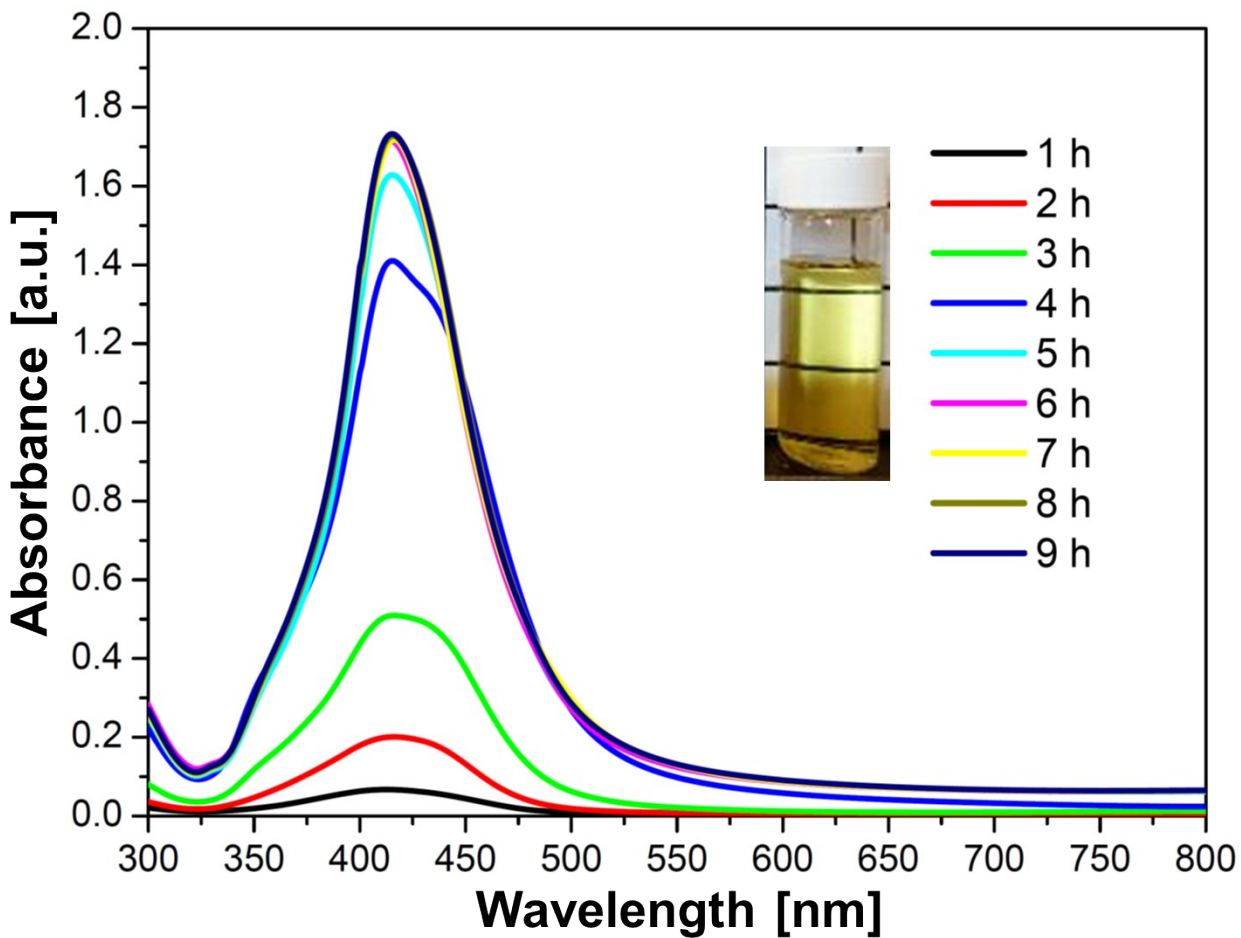

**Fig. S2** UV-vis absorption spectra of the colloidal AgNPs in  $\text{AgNO}_3$ /copolymer/silicate reductions with a weight ratio of 1:1:0. Inset: 0.005 wt% yellow-gold solution confirming AgNP formation following treatment at 80 °C for 9 h.

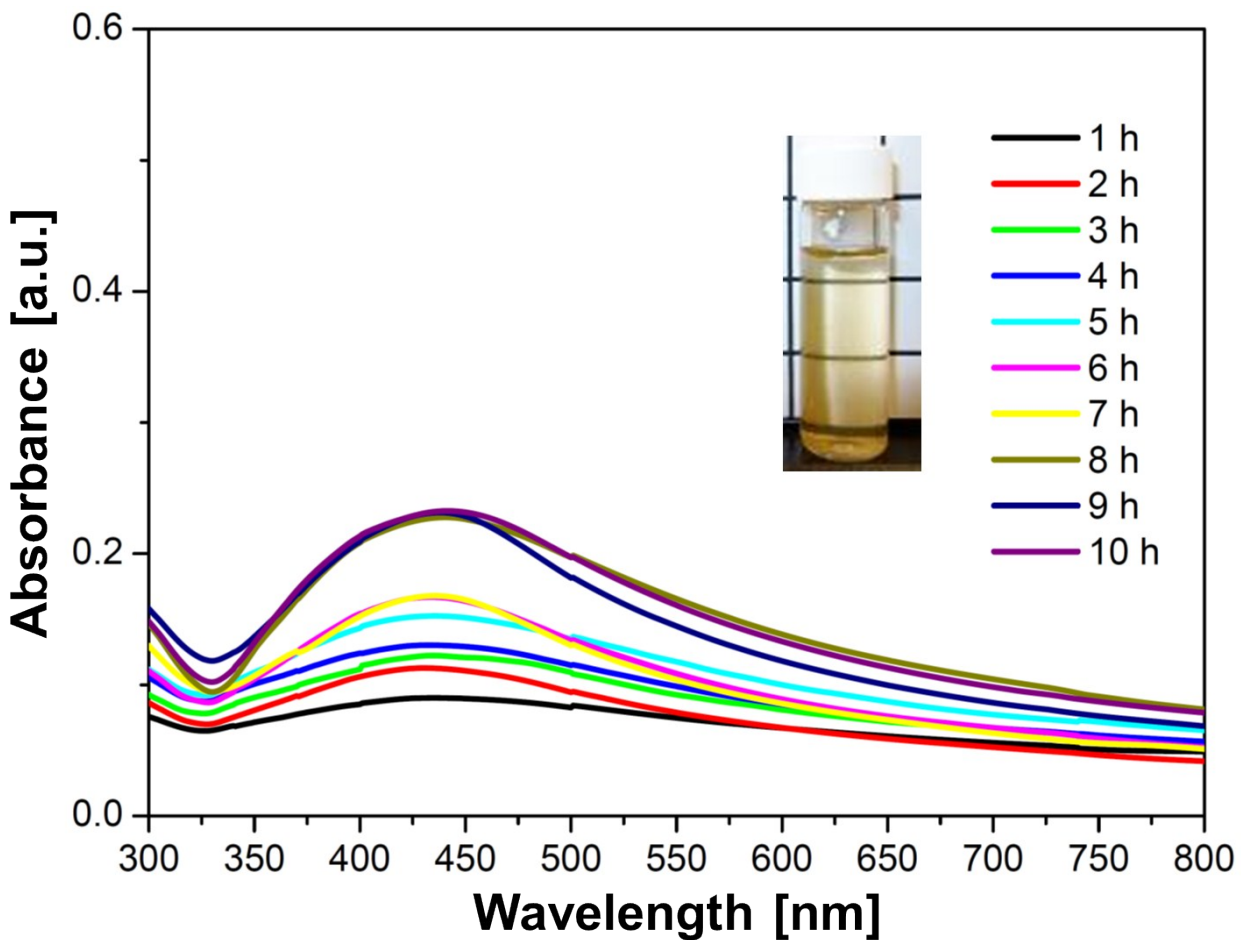

**Fig. S3** UV-vis absorption spectra of the colloidal AgNPs in  $\text{AgNO}_3$ /copolymer/silicate reductions with a weight ratio of 1:1:1. Inset: 0.005 wt% yellow-gold solution confirming AgNP formation following treatment at 80 °C for 10 h.

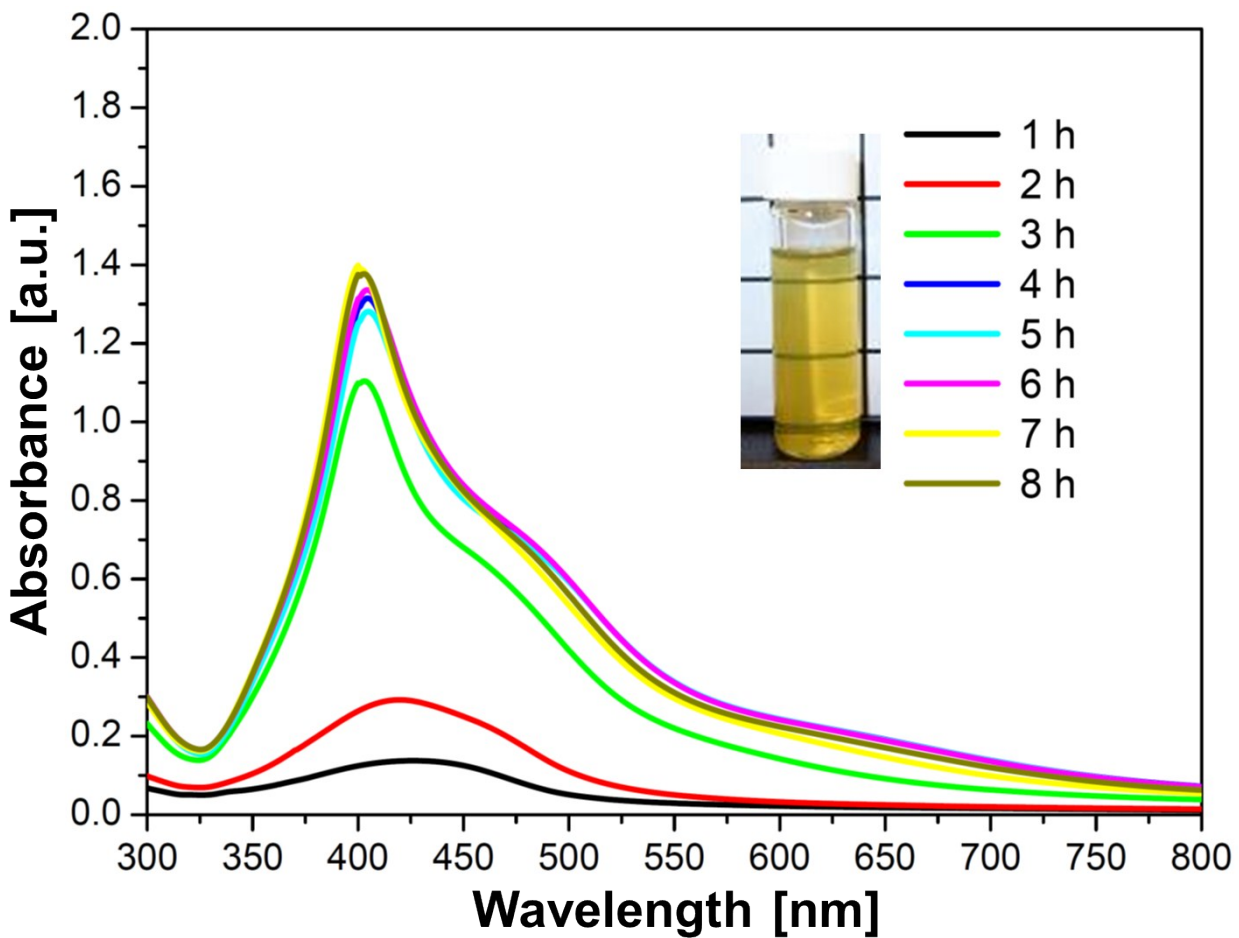

**Fig. S4** UV-vis absorption spectra of the colloidal AgNPs in AgNO<sub>3</sub>/copolymer/silicate reductions with a weight ratio of 10:10:1. Inset: 0.005 wt% yellow-gold solution confirming AgNP formation following treatment at 80 °C for 8 h.



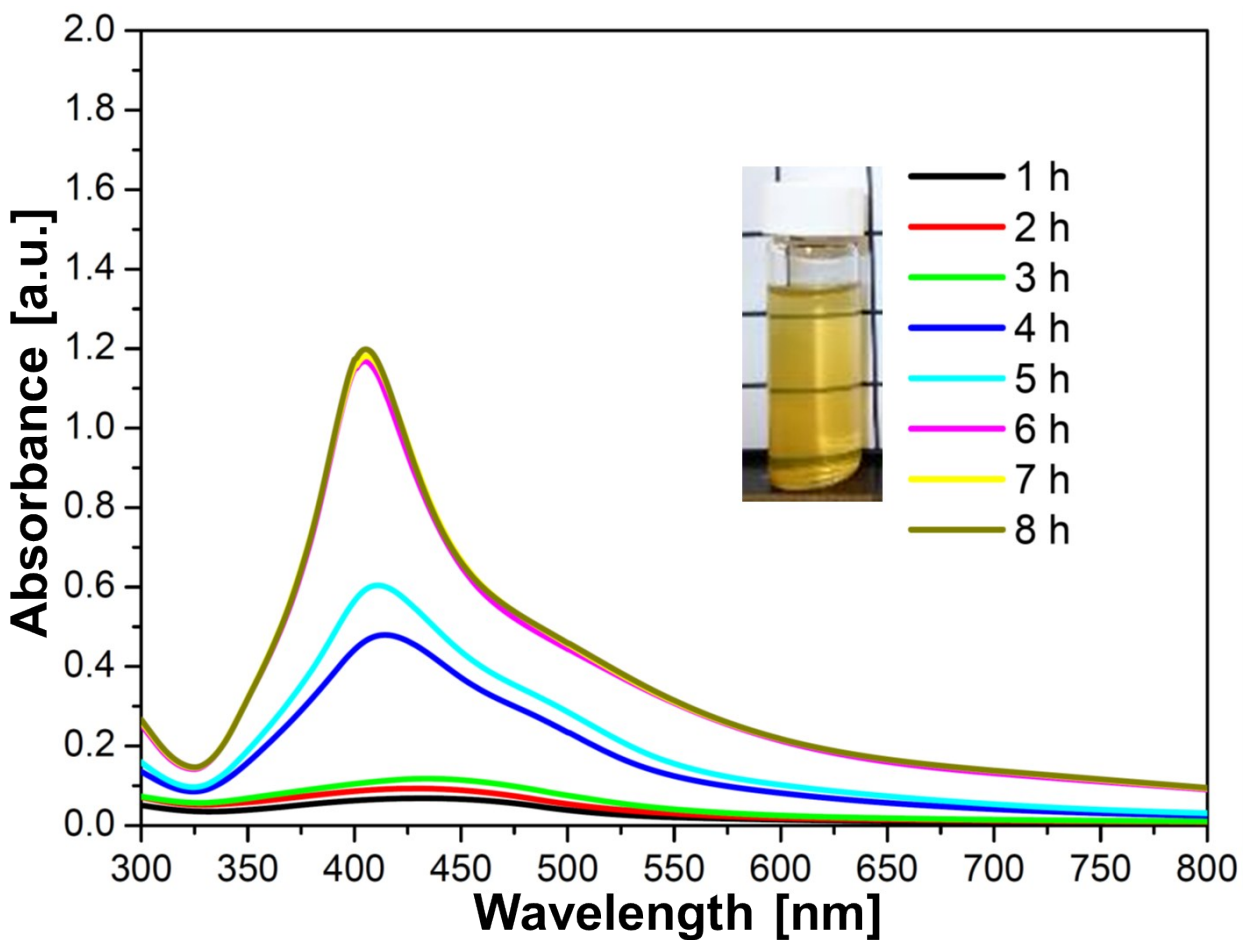

**Fig. S5** UV-vis absorption spectra of the colloidal AgNPs in AgNO<sub>3</sub>/copolymer/silicate reductions with a weight ratio of 20:20:1. Inset: 0.005 wt% yellow-gold solution confirming AgNP formation following treatment at 80 °C for 8 h.

**Table S1.** Solubility of PIB-SA, POE-2000, and tri-block copolymer in water and organic solvents.

| Sample              | H <sub>2</sub> O | Ethanol | Toluene | Decane |
|---------------------|------------------|---------|---------|--------|
| PIB-SA              | -                | -       | +       | +      |
| POE-2000            | +                | +       | +-      | -      |
| Tri-block copolymer | +                | +       | +       | +      |

+: soluble; + -: soluble, but sediments form after 2 h settling; -: insoluble.
